# Supplementary material for: Laboratory Rodent Diets Contain Toxic Levels of Environmental Contaminants: Implications for Regulatory Tests
Source: PLoS One. 2015 Jul 2;10(7):e0128429. doi: 10.1371/journal.pone.0128429 (PMC4489719; doi:10.1371/journal.pone.0128429)
Supplement: S1 Data — (XLSX) [file pone.0128429.s001.XLSX]

## Sheet: Residues data
			LOD : Limit Of Detection
			LOQ : Limit of Quantification
			in ppb	Pirimiphos methyl	Piperonyl butoxide	Deltamethrin	Glyphosate	AMPA	Chlorpyriphos methyl	Chlorpyriphos ethyl	Metalaxyl	Malathion
			4RF21 (Italy)	1500	1000	141	<LOD	<LOD	<LOD	<LOD	<LOD	<LOD
			TD.2016 (Italy)	1800	36	<LOD	<LOD	<LOD	<LOD	<LOD	<LOD	<LOD
			NUVILAB CR1 (Brazil)	230	140	<LOD	130	240	59	23	<LOD	<LOD
			S8106-S011 (Germany)	280	290	<LOD	<LOQ	110	10	<LOD	<LOD	<LOD
			Purolab 22P (Brazil)	150	65	<LOD	60	170	<LOD	10	20	<LOD
			R94 (New Zealand)	290	<LOD	<LOD	<LOQ	170	<LOD	<LOD	<LOD	<LOD
			Belmill Mice pencil (Kenya)	190	<LOD	<LOD	<LOD	<LOD	<LOD	16	<LOD	170
			LabDiet 5002 (USA)	<LOD	<LOD	<LOD	110	200	<LOD	<LOD	<LOD	11
			HFK 1022 (China)	<LOD	<LOD	<LOD	70	80	<LOD	<LOD	<LOD	20
			801151 RM1 (England)	<LOD	15	<LOD	140	<LOD	<LOD	<LOD	<LOD	<LOD
			7913 NIH 31 (USA)	<LOD	<LOD	<LOD	70	<LOD	<LOD	<LOD	<LOD	<LOD
			A04 (France)	26	17	<LOD	<LOD	<LOD	<LOD	<LOD	<LOD	<LOD
			V1326-000 (Germany)	<LOD	15	<LOD	<LOQ	<LOD	<LOD	<LOD	<LOD	<LOD
			in ppb	Pb	uncertainty	Cd	uncertainty	Hg	uncertainty	As	uncertainty
			4RF21 (Italy)	160	60	90	40	<LOD	-	<LOD	-
			TD.2016 (Italy)	130	50	40	20	<LOD	-	<LOD	-
			NUVILAB CR1 (Brazil)	130	60	70	30	<LOD	-	<LOD	-
			S8106-S011 (Germany)	270	110	50	20	<LOD	-	<LOD	-
			Purolab 22P (Brazil)	300	120	30	10	<LOD	-	<LOD	-
			R94 (New Zealand)	140	60	30	10	<LOD	-	<LOD	-
			Belmill Mice pencil (Kenya)	580	230	40	20	<LOD	-	<LOD	-
			LabDiet 5002 (USA)	130	50	50	20	<LOD	-	<LOD	-
			HFK 1022 (China)	130	50	100	10	10	2	<LOD	-
			801151 RM1 (England)	440	180	40	20	<LOD	-	<LOD	-
			7913 NIH 31 (USA)	130	50	40	20	<LOD	-	<LOD	-
			A04 (France)	<LOD	-	40	20	10	2	200	60
			V1326-000 (Germany)	250	100	60	20	<LOD	-	<LOD	-
			In ng/kg TEQ	Dioxins	uncertainty	Dioxin-like PCBs	uncertainty	SUM
			4RF21 (Italy)	0.075	0.022	0.034	0.01	0.109
			TD.2016 (Italy)	0.075	0.022	0.035	0.01	0.11
			NUVILAB CR1 (Brazil)	0.075	0.022	0.035	0.01	0.11
			S8106-S011 (Germany)	0.076	0.022	0.052	0.015	0.128
			Purolab 22P (Brazil)	0.076	0.022	0.035	0.01	0.111
			R94 (New Zealand)	0.078	0.022	0.036	0.011	0.114
			Belmill Mice pencil (Kenya)	0.083	0.024	0.035	0.01	0.118
			LabDiet 5002 (USA)	0.12	0.035	0.035	0.01	0.155
			HFK 1022 (China)	0.074	0.021	0.034	0.01	0.108
			801151 RM1 (England)	0.075	0.022	0.036	0.01	0.111
			7913 NIH 31 (USA)	0.13	0.039	0.15	0.045	0.28
			A04 (France)	0.08	0.023	0.086	0.025	0.166
			V1326-000 (Germany)	0.067	0.019	0.035	0.01	0.102
			in ppt	PCB 153	PCB 101	PCB 138	PCB 118	PCB 180	PCB 28	PCB 52	sum 6pcbi ww	uncertainty
			4RF21 (Italy)	290	180	140	53	<LOD	<LOD	<LOD	650	350
			TD.2016 (Italy)	250	160	130	47	<LOD	<LOD	<LOD	590	330
			NUVILAB CR1 (Brazil)	470	260	210	66	110	<LOD	<LOD	1015	405
			S8106-S011 (Germany)	960	380	480	140	220	<LOD	<LOD	1900	680
			Purolab 22P (Brazil)	230	130	100	36	<LOD	<LOD	<LOD	530	310
			R94 (New Zealand)	330	220	150	52	<LOD	<LOD	<LOD	735	275
			Belmill Mice pencil (Kenya)	260	140	130	44	<LOD	100	<LOD	640	290
			LabDiet 5002 (USA)	400	230	190	81	120	<LOD	<LOD	900	370
			HFK 1022 (China)	250	170	130	43	<LOD	<LOD	<LOD	600	330
			801151 RM1 (England)	260	290	130	79	<LOD	<LOD	<LOD	710	370
			7913 NIH 31 (USA)	880	460	420	200	280	<LOD	170	1950	640
			A04 (France)	540	210	270	130	150	<LOD	<LOD	1100	450
			V1326-000 (Germany)	430	250	200	65	110	<LOD	<LOD	935	365
			%	RRS1	MON810	NK603	RRS2	GA 21	MIR 162	MON 863	DAS1507	T25	MON88017
			4RF21 (Italy)	<LOD	<LOD	<LOD	<LOD	<LOD	<LOD	<LOD	<LOD	<LOD	<LOD
			TD.2016 (Italy)	<LOD	<LOD	<LOD	<LOD	<LOD	<LOD	<LOD	<LOD	<LOD	<LOD
			NUVILAB CR1 (Brazil)	9.2 ± 4.3	<LOD	<LOD	<LOD	<LOD	<LOD	<LOD	<LOD	<LOD	<LOD
			S8106-S011 (Germany)	3 ± 1.14	<LOD	<LOD	0,63 ± 0,11	<LOD	<LOD	<LOD	<LOD	<LOD	<LOD
			Purolab 22P (Brazil)	48 ± 17.5	<LOD	<LOD	<LOQ	<LOD	<LOD	<LOD	<LOD	<LOD	<LOD
			R94 (New Zealand)	21 ± 11	<LOD	<LOD	<LOD	<LOD	<LOD	<LOD	<LOD	<LOD	<LOD
			Belmill Mice pencil (Kenya)	<LOD	<LOD	<LOD	<LOD	<LOD	<LOD	<LOD	<LOD	<LOD	<LOD
			LabDiet 5002 (USA)	10.3 ± 4.3	14.9 ± 6.9	18.1 ± 8.3	2,54 ± 0,38	<LOD	<LOD	<LOD	2,6 ± 0,7	<LOD	<LOD
			HFK 1022 (China)	4.3 ± 1.6	<LOD	<LOD	<LOQ	<LOD	<LOD	<LOD	<LOD	<LOD	<LOD
			801151 RM1 (England)	0.47 ± 0.21	<LOD	<LOD	<LOQ	<LOD	<LOD	<LOD	<LOD	<LOD	<LOD
			7913 NIH 31 (USA)	0.3 ± 0.1	12.4 ± 5.4	0.8 ± 0.3	0,17 ± 0,04	<LOD	< 0,1 %	< 0,1 %	1,38 ± 0,28	<0,54%	< 0,1 %
			A04 (France)	<LOD	<LOD	<LOD	<LOD	<LOD	<LOD	<LOD	<LOD	<LOD	<LOD
			V1326-000 (Germany)	<LOD	0.4 ± 0.2	1.4 ± 0.6	<LOQ	< 0,1%	< 0,1 %	<LOD	<LOD	<LOD	<LOD

## Sheet: Daily intakes
	Daily intakes
	In μg/kg/bw	Pirimiphos methyl	Piperonyl butoxide	Deltamethrin	Glyphosate	AMPA	Chlorpyriphos methyl	Chlorpyriphos ethyl	Metalaxyl	Malathion
	4RF21 (Italy)	75	50	7.05	0	0	0	0	0	0
	TD.2016 (Italy)	90	1.8	0	0	0	0	0	0	0
	NUVILAB CR1 (Brazil)	11.5	7	0	6.5	12	2.95	1.15	0	0
	S8106-S011 (Germany)	14	14.5	0	d	5.5	0.5	0	0	0
	Purolab 22P (Brazil)	7.5	3.25	0	3	8.5	0	0.5	1	0
	R94 (New Zealand)	14.5	0	0	d	8.5	0	0	0	0
	Belmill Mice pencil (Kenya)	9.5	0	0	0	0	0	0.8	0	8.5
	LabDiet 5002 (USA)	0	0	0	5.5	10	0	0	0	0.55
	HFK 1022 (China)	0	0	0	3.5	4	0	0	0	1
	801151 RM1 (England)	0	0.75	0	7	0	0	0	0	0
	7913 NIH 31 (USA)	0	0	0	3.5	0	0	0	0	0
	A04 (France)	1.3	0.85	0	0	0	0	0	0	0
	V1326-000 (Germany)	0	0.75	0	d	0	0	0	0	0
	In μg/kg/bw	Pb	Cd	Hg	As
	4RF21 (Italy)	8	4.5	0	0
	TD.2016 (Italy)	6.5	2	0	0
	NUVILAB CR1 (Brazil)	6.5	3.5	0	0
	S8106-S011 (Germany)	13.5	2.5	0	0
	Purolab 22P (Brazil)	15	1.5	0	0
	R94 (New Zealand)	7	1.5	0	0
	Belmill Mice pencil (Kenya)	29	2	0	0
	LabDiet 5002 (USA)	6.5	2.5	0	0
	HFK 1022 (China)	6.5	5	0.5	0
	801151 RM1 (England)	22	2	0	0
	7913 NIH 31 (USA)	6.5	2	0	0
	A04 (France)	0	2	0.5	10
	V1326-000 (Germany)	12.5	3	0	0
	In pg TEQ/kg/bw/d for PCDD/Fs and PCDD/Fs + DL-PCBs and in ng/kg/bw/d for the sum of the 6 PCBi	Dioxins	Dioxin-like PCBs	Sum PCDD/Fs+DL-PCBs	SUM PCBi ww
	4RF21 (Italy)	3.75	1.7	5.45	32.5
	TD.2016 (Italy)	3.75	1.75	5.5	29.5
	NUVILAB CR1 (Brazil)	3.75	1.75	5.5	50.75
	S8106-S011 (Germany)	3.8	2.6	6.4	95
	Purolab 22P (Brazil)	3.8	1.75	5.55	26.5
	R94 (New Zealand)	3.9	1.8	5.7	36.75
	Belmill Mice pencil (Kenya)	4.15	1.75	5.9	32
	LabDiet 5002 (USA)	6	1.75	7.75	45
	HFK 1022 (China)	3.7	1.7	5.4	30
	801151 RM1 (England)	3.75	1.8	5.55	35.5
	7913 NIH 31 (USA)	6.5	7.5	14	97.5
	A04 (France)	4	4.3	8.3	55
	V1326-000 (Germany)	3.35	1.75	5.1	46.75
